# Supplementary material for: Towards Raman-Based Screening of Acute Lymphoblastic Leukemia-Type B (B-ALL) Subtypes
Source: MDPI journal article supplement (doi:10.3390/cancers13215483), 2021-10-31
Supplement: s1 [file s1]

## Supplementary Information

**Supplementary Table S1.** Details of samples used in the study.

| Sample ID | Immunophenotype     | Type of gene rearrangements | Blastosis on diagnosis | Cell viability |
|-----------|---------------------|-----------------------------|------------------------|----------------|
| P1        | pre-B common        | TEL-AML1                    | 65%                    | 70%            |
| P2        | pre-B common        | TEL-AML1                    | 98%                    | 81%            |
| P3        | pre-B               | TEL-AML1                    | 91%                    | 81%            |
| P4        | pre-B common        | TEL-AML1                    | 93%                    | 73%            |
| P5        | pre-B common        | BCR-ABL1                    | 83%                    | 56%            |
| P6        | ND                  | BCR-ABL1                    | ND                     | 43%            |
| P7        | pre-B common        | BCR-ABL1                    | 91%                    | 55%            |
| P8        | pre-B               | TCF3-PBX1                   | 95%                    | 88%            |
| P9        | pre-B               | TCF3-PBX1                   | 86%                    | 50%            |
| P10       | pre-B common        | TCF3-PBX1                   | 94%                    | 84%            |
| HV1       | normal lymphocyte B | -                           | -                      | 96%            |
| HV2       | normal lymphocyte B | -                           | -                      | 86%            |
| HV3       | normal lymphocyte B | -                           | -                      | 78%            |
| HV4       | normal lymphocyte B | -                           | -                      | 98%            |
| HV5       | normal lymphocyte B | -                           | -                      | 96%            |

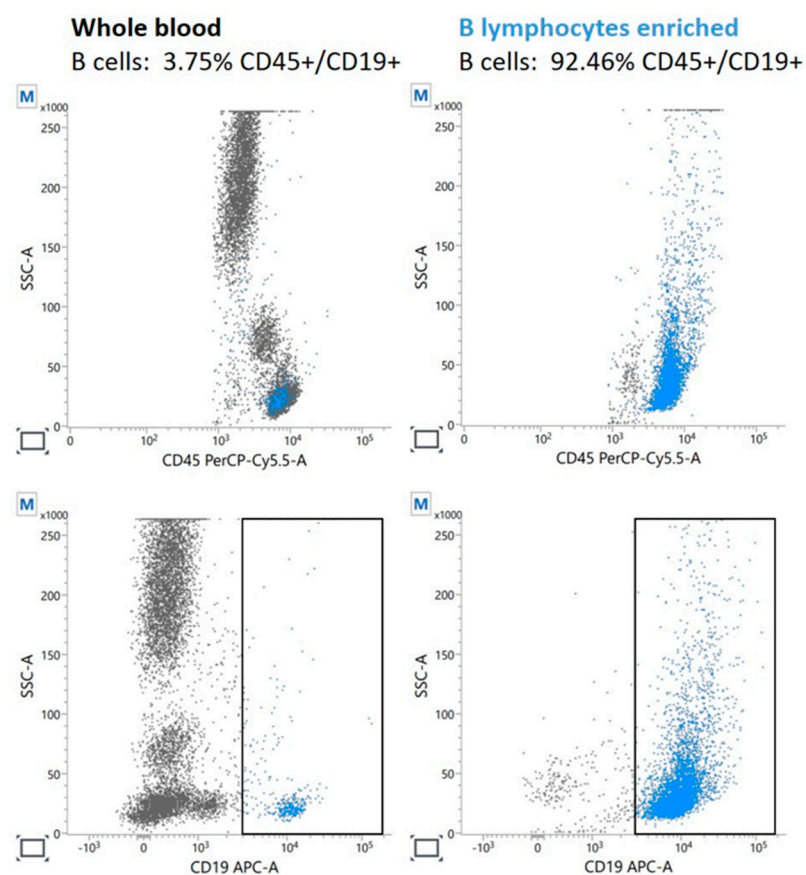

**Supplementary Figure S1.** Purity assessment of the B cell fraction by flow cytometry. Before and directly after the magnetic sorting procedure, B cell fraction was subjected to purity assessment. The lymphocyte population was identified based on side-scatter (SSC) characteristics and CD45 expression. In the whole blood, B cells were defined further as CD19-expressing cells in the CD45-positive population. The initial concentration of CD19+ cells in the blood of one healthy volunteer was 3.75%. After magnetic separation, the purity of enriched lymphocytes was assessed within CD45 positive leucocytes and exceeded 90%. The picture presents the analysis of one sample.

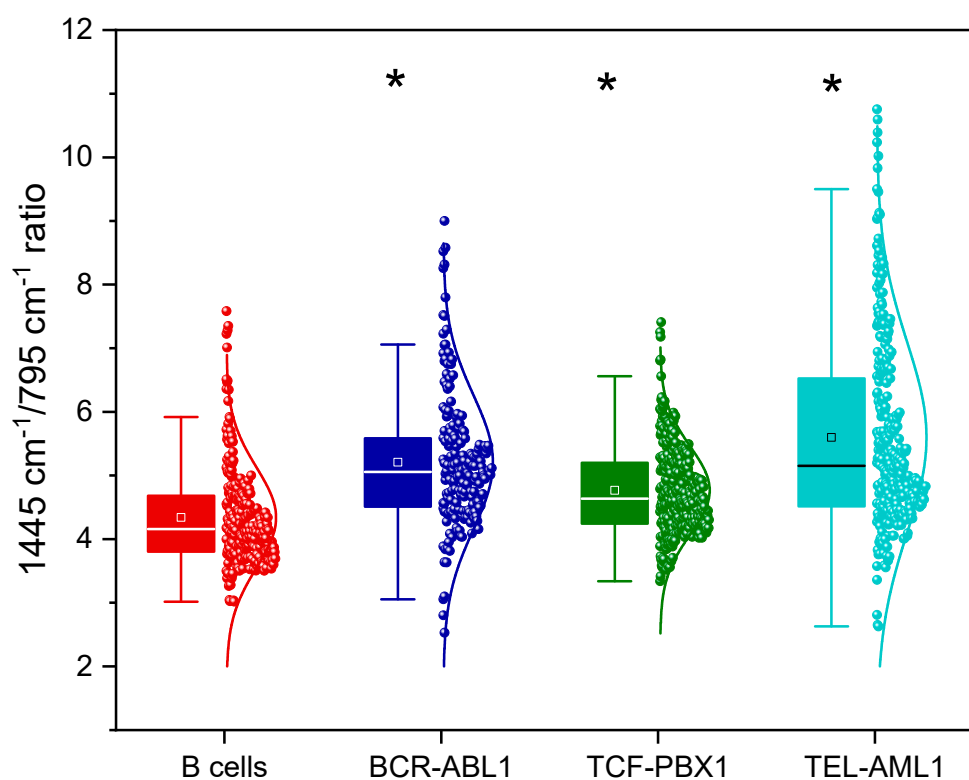

**Supplementary Figure S2.** The  $1445\text{ cm}^{-1}/795\text{ cm}^{-1}$  ratio calculated based on the spectra obtained with the use of 532 nm laser for B cells ( $n=250$ ), and BCR-ABL1 ( $n=180$ ), TCF3-PBX1 ( $n=326$ ), TEL-AML1 ( $n=302$ ) lymphoblasts. Due to the lack of a normal distribution, a non-parametric was used to test the significance of changes with respect to normal cells (Mann-Whitney U test,  $p < 0.05$ ).

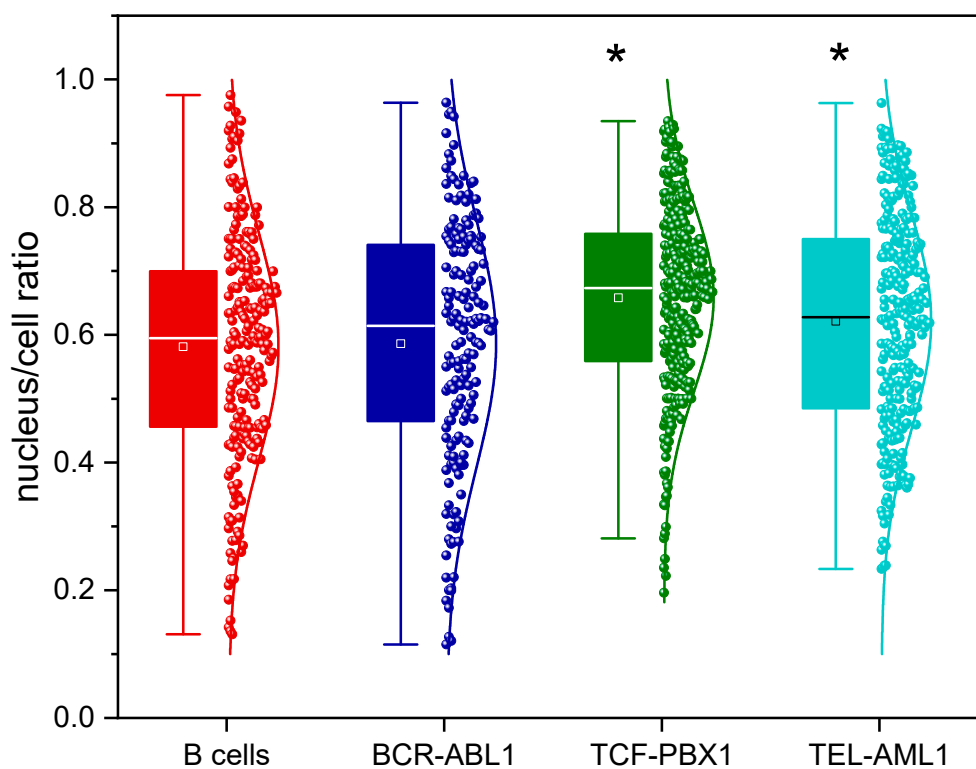

**Supplementary Figure S3.** The nucleus/cell ratio calculated based on the KMC maps obtained with the use of 532 nm laser for B cells ( $n=254$ ), and BCR-ABL1 ( $n=183$ ), TCF3-PBX1 ( $n=331$ ), TEL-AML1 ( $n=314$ ) lymphoblasts.

---

Due to the lack of a normal distribution, a non-parametric was used to test the significance of changes with respect to normal cells (Mann-Whitney U test,  $p < 0.05$ ).
